# Supplementary material
Source: PubMed Central journal article supplement (PMC341840)
Supplement: pnas_0305763101_3.pdf [file pnas_0305763101_3.pdf]

```

-> U3
HERVWE1-RG0-[5]d TGAGAGACAGGACTAGCTGGATTTCCTAGGCCGACTAAGAATCCCTAAGCCTAGCTGGGAAGGTGACCACCTCCACCTTTAAACACGGGGCTGCAACTTAGCTCACACCTGACCAATCA 120
HERVWE1-132A-[5]d .....T.....A..... 120
HERVWE1-24A-[5]d .....T.....A..... 120
HERVWE1-RG0-[3]d .....T.....A..... 120
HERVWE1-37B-[3]d .....T.....A..... 120
HERVWE1-24A-[3]d .....T.....A..... 120
HERVWE1-22B-[3]d .....T.....A..... 120
HERVWE1-83A-[3]d .....T.....A..... 120
HERVWE1-37A-[3]d .....T.....A..... 120
HERVWE1-132A-[3]d .....T.....A..... 120
HERVWE1-71A-[3]d .....T.....A..... 120
HERVWE1-80B-[3]d .....T.....A..... 120
HERVWE1-132B-[3]d .....T.....A..... 120
HERV-WPH74-[3]r .....A.....A.....T.....A.....T.....A.....C.....C.....C..... 120
HERV-WB-[3]r .....A.....A.....T.....A.....T.....A.....C.....C.....C..... 120
HERV-WHS14-[3]d .....C.....TG.A.....CA..... 120

```

```

                                CMAT-Box                                TATA-Box
HERVWE1-RG0-[5]d G-----AGAGCTCACTAAAATGCTAATTAGGCAAAGACAGGAGGTAAGAAATAGCCAATCATCTATTGCCCTGAGAGCACAGCAGGAGGGACAAATCGGGAATAAATCCAGGC 231
HERVWE1-132A-[5]d .....T.....A.....TAGCCAATCATCTATTGCCCTGAGAGCACAGCAGGAGGGACAAATCGGGAATAAATCCAGGC 231
HERVWE1-24A-[5]d .....T.....A.....TAGCCAATCATCTATTGCCCTGAGAGCACAGCAGGAGGGACAAATCGGGAATAAATCCAGGC 231
HERVWE1-RG0-[3]d .....T.....A.....TAGCCAATCATCTATTGCCCTGAGAGCACAGCAGGAGGGACAAATCGGGAATAAATCCAGGC 231
HERVWE1-37B-[3]d .....T.....A.....TAGCCAATCATCTATTGCCCTGAGAGCACAGCAGGAGGGACAAATCGGGAATAAATCCAGGC 231
HERVWE1-24A-[3]d .....T.....A.....TAGCCAATCATCTATTGCCCTGAGAGCACAGCAGGAGGGACAAATCGGGAATAAATCCAGGC 231
HERVWE1-22B-[3]d .....T.....A.....TAGCCAATCATCTATTGCCCTGAGAGCACAGCAGGAGGGACAAATCGGGAATAAATCCAGGC 231
HERVWE1-83A-[3]d .....C.....A.....TAGCCAATCATCTATTGCCCTGAGAGCACAGCAGGAGGGACAAATCGGGAATAAATCCAGGC 231
HERVWE1-37A-[3]d .....T.....A.....TAGCCAATCATCTATTGCCCTGAGAGCACAGCAGGAGGGACAAATCGGGAATAAATCCAGGC 231
HERVWE1-132A-[3]d .....T.....A.....TAGCCAATCATCTATTGCCCTGAGAGCACAGCAGGAGGGACAAATCGGGAATAAATCCAGGC 231
HERVWE1-71A-[3]d .....T.....A.....TAGCCAATCATCTATTGCCCTGAGAGCACAGCAGGAGGGACAAATCGGGAATAAATCCAGGC 231
HERVWE1-80B-[3]d .....T.....A.....TAGCCAATCATCTATTGCCCTGAGAGCACAGCAGGAGGGACAAATCGGGAATAAATCCAGGC 231
HERVWE1-132B-[3]d .....T.....A.....TAGCCAATCATCTATTGCCCTGAGAGCACAGCAGGAGGGACAAATCGGGAATAAATCCAGGC 231
HERV-WPH74-[3]r .....GTAAGAAAG.....C.G.....A.....TAGCCAATCATCTATTGCCCTGAGAGCACAGCAGGAGGGACAAATCGGGAATAAATCCAGGC 231
HERV-WB-[3]r .....GTAAGAAAG.....C.G.....A.....TAGCCAATCATCTATTGCCCTGAGAGCACAGCAGGAGGGACAAATCGGGAATAAATCCAGGC 240
HERV-WHS14-[3]d .....A.....TAGCCAATCATCTATTGCCCTGAGAGCACAGCAGGAGGGACAAATCGGGAATAAATCCAGGC 229

```

```

                                U3 -><-                                R                                [polyA]                                -><- U5
HERVWE1-RG0-[5]d ATTTCGAGCTGGCAACACGACGCCCCCTTTGGGTCCTTCCCTTTGTATGGGAGC-----TGTTTCATGCTATTTCACCTCTATTAAATCTTGCACTGCACCTCTCTGGTCCATGTTCTTTCAC 349
HERVWE1-132A-[5]d .....T.....A.....TGTTTCATGCTATTTCACCTCTATTAAATCTTGCACTGCACCTCTCTGGTCCATGTTCTTTCAC 349
HERVWE1-24A-[5]d .....T.....A.....TGTTTCATGCTATTTCACCTCTATTAAATCTTGCACTGCACCTCTCTGGTCCATGTTCTTTCAC 349
HERVWE1-RG0-[3]d C.....C.....G.....A.....-.....C.....TC..... 350
HERVWE1-37B-[3]d C.....C.....G.....A.....-.....C.....TC..... 350
HERVWE1-24A-[3]d C.....C.....G.....A.....-.....C.....TC..... 350
HERVWE1-22B-[3]d C.....C.....G.....A.....-.....C.....TC..... 350
HERVWE1-83A-[3]d C.....C.....G.....A.....-.....C.....G.....TC..... 350
HERVWE1-37A-[3]d C.....C.....G.....A.....-.....C.....TC..... 350
HERVWE1-132A-[3]d C.....C.....G.....A.....-.....C.....TC..... 350
HERVWE1-71A-[3]d C.....C.....G.....A.....-.....C.....TC..... 350
HERVWE1-80B-[3]d C.....C.....G.....A.....-.....C.....TC..... 350
HERVWE1-132B-[3]d C.....C.....G.....A.....-.....C.....TC..... 350
HERV-WPH74-[3]r C.....C.....G.....A.....-.....C.....TC..... 327
HERV-WB-[3]r .....C.....GA.TA.....T.....C.....TC..... 303
HERV-WHS14-[3]d .....C.....G.....A.....-.....C.....TC.....CT..... 322

```

```

HERVWE1-RG0-[5]d GGCTCGAGCTGAGCTTTTGTCTACCCGTCACCCAGTCTGTGTTGSCACACCCAGACAGCTCCGCTGACTCCCATCCCTTGGATCCTGCAGGGTGTCCGCTGTGCTCCTGATCCAGCGAG 469
HERVWE1-132A-[5]d .....T.....C.....G.....A.....G.....C.....A..... 469
HERVWE1-24A-[5]d .....T.....C.....G.....A.....G.....C.....A..... 469
HERVWE1-RG0-[3]d .....T.....C.....G.....A.....G.....C.....A..... 470
HERVWE1-37B-[3]d .....T.....C.....G.....A.....G.....C.....A..... 470
HERVWE1-24A-[3]d .....T.....C.....G.....A.....G.....C.....A..... 470
HERVWE1-22B-[3]d .....T.....C.....G.....A.....G.....C.....A..... 470
HERVWE1-83A-[3]d .....T.....C.....G.....A.....G.....C.....A..... 470
HERVWE1-37A-[3]d .....T.....C.....G.....A.....G.....C.....A..... 470
HERVWE1-132A-[3]d .....T.....C.....G.....A.....G.....C.....A..... 470
HERVWE1-71A-[3]d .....T.....C.....G.....A.....G.....C.....A..... 470
HERVWE1-80B-[3]d .....T.....C.....G.....A.....G.....C.....A..... 470
HERVWE1-132B-[3]d .....T.....C.....G.....A.....G.....C.....A..... 470

```

```

HERVWE1-RG0-[5]d GCGCCCATTCGCCCTCCCAATTTGGGCTAAAGGCTTGCCATGTTCTCCGACCGGCTAAGTCCCTGGGTTTGTCTAATTGAGCTGAACACTAGTCACTGGGTCCATGGTTCTCTCTGTG 589
HERVWE1-132A-[5]d .....T.....C..... 589
HERVWE1-24A-[5]d .....T.....C..... 589
HERVWE1-RG0-[3]d .....A.....C.....G.....T.....CA.C..... 590
HERVWE1-37B-[3]d .....A.....C.....G.....T.....CA.C..... 590
HERVWE1-24A-[3]d .....A.....C.....G.....T.....CA.C..... 590
HERVWE1-22B-[3]d .....A.....C.....G.....T.....CA.C..... 590
HERVWE1-83A-[3]d .....A.....C.....G.....T.....CA.C..... 590
HERVWE1-37A-[3]d .....A.....C.....G.....T.....CA.C..... 590
HERVWE1-132A-[3]d .....A.....C.....G.....T.....CA.C..... 590
HERVWE1-71A-[3]d .....A.....C.....G.....T.....CA.C..... 590
HERVWE1-80B-[3]d .....A.....C.....G.....T.....CA.C..... 590
HERVWE1-132B-[3]d .....A.....C.....G.....T.....CA.C..... 590

```

```

HERVWE1-RG0-[5]d ACCCCGCGCTTCTAATGAACTATAACACTTACCACATGGCCAGATTCACATTCCTTGGAAATCCGTGAGGCAAGAAGTCCAGGTGACAGAAATACGAGGCTTCCACCACCTTTGGAAGC 709
HERVWE1-132A-[5]d .....A.....G.....C.....G.....G.....A.A.....C.....C..... 709
HERVWE1-24A-[5]d .....A.....G.....C.....G.....G.....A.A.....C.....C..... 705
HERVWE1-RG0-[3]d .....A.....G.....C.....G.....G.....A.A.....C.....C..... 705
HERVWE1-37B-[3]d .....A.....G.....C.....G.....G.....A.A.....C.....C..... 705
HERVWE1-24A-[3]d .....A.....G.....C.....G.....G.....A.A.....C.....C..... 705
HERVWE1-22B-[3]d .....A.....G.....C.....G.....G.....A.A.....C.....C..... 705
HERVWE1-83A-[3]d .....A.....G.....C.....G.....G.....A.A.....C.....C..... 705
HERVWE1-37A-[3]d .....A.....G.....C.....G.....G.....A.A.....C.....C..... 705
HERVWE1-132A-[3]d .....A.....G.....C.....G.....G.....A.A.....C.....C..... 705
HERVWE1-71A-[3]d .....A.....G.....C.....G.....G.....A.A.....C.....C..... 705
HERVWE1-80B-[3]d .....A.....G.....C.....G.....G.....A.A.....C.....C..... 705
HERVWE1-132B-[3]d .....A.....G.....C.....G.....G.....A.A.....C.....C..... 705

```

```

                                U5 ->
HERVWE1-RG0-[5]d GGCTCGCTACCATCTTGAAGTGGTTTCAACCACCTTTGGGAGCTCTGTGAGCAAGGACCCCGGTAAACA 780
HERVWE1-132A-[5]d .....T.....A..... 780
HERVWE1-24A-[5]d .....T.....A..... 780
HERVWE1-RG0-[3]d .....T.....A..... 736
HERVWE1-37B-[3]d .....T.....A..... 736
HERVWE1-24A-[3]d .....T.....A..... 736
HERVWE1-22B-[3]d .....T.....A..... 736
HERVWE1-83A-[3]d .....T.....A..... 736
HERVWE1-37A-[3]d .....T.....A..... 736
HERVWE1-132A-[3]d .....T.....A..... 736
HERVWE1-71A-[3]d .....T.....A..... 736
HERVWE1-80B-[3]d .....T.....A..... 736
HERVWE1-132B-[3]d .....T.....G.....A..... 736

```
