# Supplementary material
Source: PubMed Central journal article supplement (PMC341840)
Supplement: pnas_0305763101_5.pdf [file pnas_0305763101_5.pdf]

```

=>          L          =><=          SU
MALPYHIFLFTVLLPSFTLTAPPPCRCMTSSSPYQEFLWRMQRPGNIDAPSYRSLSKGTPFTFAHTHMPRNCYHSATLCMHANTHYWTGKMINPSCPGGL 100
GVTVCWTYFTQTGMSDGGGVQDQAREKHVKEVISQLTRVHGTSSPYKGLDLSKLEHETLRTHTRLVSLFNTTLTGLHEVSAQNPTNCWICLPLNFRPYVSI 200
PVPEQWNNFSTEINTSVLVGPLVSNLEITHTSNLTCVKFSNTTYTNSQCIRWVTPPTQIVCLPSGIFVCGTSAYRCLNGSSESMCFLSFLVPPMTIY 300
TEQDLYSYVISKPRNKRVPilpfvigaagvlgalgtgiggiTTSTQFYKLSQELNGDMERVADSLVTLQDQLNSLAavvlqnrardlltaerggtCLFL 400
GEECCYYVNQSGIVTEKVKKEIRDRIQRRAEELRNTGPWGLLSQWMPWILPFLGPLAAIILLLLFGPCIFNLLVNFVSSRIEAVKLQMEPKMQSKTKIYRR 500
PLDRPASPRSDVNDIKGTPPEEISAAQPLLRPNSAGSS
=>

```
