# Supplementary material
Source: PubMed Central journal article supplement (PMC341840)
Supplement: pnas_0305763101_7.pdf [file pnas_0305763101_7.pdf]

```

HERVW1-RG0.5 TGAGAGACAGGACTAGCTGGATTTCCTAGGCGACTAAGAATCCCTAAGCCTAGCTGGGA 60
CERVW1-A.5 ..... 60
CERVW1-B.5 ..... 60
GoERVW1-A/B.5 ..... 60
OERVW1-A/B.5 .....A.....T..... 60
GiERVW1-A.5 .....T..... 60
GiERVW1-B.5 .....T..... 60
HERVW1-RG0.3 .....T..... 60
CERVW1-A/B.3 .....T..... 60
GoERVW1-A/B.3 .....T..... 60
OERVW1-A/B.3 .....T..... 60
GiERVW1-A/B.3 .....T.....C.....T..... 60

HERVW1-RG0.5 AGGTGACCACGTCACCTTTAAACACGGGGCTTGCAACTTAGCTCACACCTGACCAATCA 120
CERVW1-A.5 .....A.....C..... 120
CERVW1-B.5 .....A.....C..... 120
GoERVW1-A/B.5 .....A.....C..... 120
OERVW1-A/B.5 .....A.....C..... 120
GiERVW1-A.5 .....A.....A.....CA..... 120
GiERVW1-B.5 .....A.....A.....CA..... 120
HERVW1-RG0.3 .....A..... 120
CERVW1-A/B.3 .....A.....T.....A..... 120
GoERVW1-A/B.3 .....A.....T.....A..... 120
OERVW1-A/B.3 .....A..... 120
GiERVW1-A/B.3 .....A.....A.....CA..... 120

                                CAAT-Box
HERVW1-RG0.5 GAGAGCTCACTAAATGCTAATTAGGCAAAGACAGGAGTAAAGAAATGAGCCATCATCT 180
CERVW1-A.5 .....A..... 180
CERVW1-B.5 .....A..... 180
GoERVW1-A/B.5 .....C..... 180
OERVW1-A/B.5 .....A.....A..... 179
GiERVW1-A.5 .....A.....G..... 180
GiERVW1-B.5 .....A.....G..... 180
HERVW1-RG0.3 .....A..... 180
CERVW1-A/B.3 .....A..... 180
GoERVW1-A/B.3 .....A..... 180
OERVW1-A/B.3 .....A..... 180
GiERVW1-A/B.3 .....A.....T..... 180

                                TATA-Box
HERVW1-RG0.5 ATTGCCTGAGACACAGCAGGAGGGACAAACAATCGGGATATAAACCAGGCATTCGAGCT 240
CERVW1-A.5 .....G..... 240
CERVW1-B.5 .....G..... 240
GoERVW1-A/B.5 .....C..... 240
OERVW1-A/B.5 .....G.....C..... 239
GiERVW1-A.5 .....A.....A.....A.....C 240
GiERVW1-B.5 .....C.....A.....A.....C 240
HERVW1-RG0.3 .....TG.....A.....TC.....C 240
CERVW1-A/B.3 .....TG.....TC..... 240
GoERVW1-A/B.3 .....TG.....C.....C 240
OERVW1-A/B.3 .....TG.....C.....C 240
GiERVW1-A/B.3 .....G.ATA.....T.....C 240

HERVW1-RG0.5 GGCAACA 247
CERVW1-A.5 ..... 247
CERVW1-B.5 ..... 247
GoERVW1-A/B.5 ..... 247
OERVW1-A/B.5 A..... 246
GiERVW1-A.5 ..... 247
GiERVW1-B.5 ..... 247
HERVW1-RG0.3 ..... 247
CERVW1-A/B.3 .....G 247
GoERVW1-A/B.3 ..T..G 247
OERVW1-A/B.3 A.....G 247
GiERVW1-A/B.3 .....G 247

```
